# Supplementary material for: Assessment of Physical Activity Using Waist-Worn Accelerometers in Hospitalized Heart Failure Patients and Its Relationship with Kansas City Cardiomyopathy Questionnaire
Source: MDPI journal article supplement (doi:10.3390/jcm10184103), 2021-09-11
Supplement: s1 [file s1]

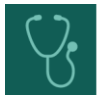

# Assessment of Physical Activity Using Waist-Worn Accelerometers in Hospitalized Heart Failure Patients and Its Relationship with Kansas City Cardiomyopathy Questionnaire

Yasuyuki Shiraishi <sup>1,\*</sup>, Nozomi Niimi <sup>1</sup>, Ayumi Goda <sup>2</sup>, Makoto Takei <sup>3</sup>, Takehiro Kimura <sup>1</sup>, Takashi Kohno <sup>2</sup>, Masataka Kawana <sup>4</sup>, Keiichi Fukuda <sup>1</sup> and Shun Kohsaka <sup>1</sup>

<sup>1</sup> Department of Cardiology, Keio University School of Medicine, Tokyo 160-8582, Japan; figarofuga@gmail.com (N.N.); kimura@z7.keio.jp (T.K.); kfukuda@a2.keio.jp (K.F.); sk@keio.jp (S.K.)

<sup>2</sup> Department of Cardiovascular Medicine, Kyorin University Faculty of Medicine, Tokyo 181-8611, Japan; ayumix34@yahoo.co.jp (A.G.); kohno.ta@gmail.com (T.K.)

<sup>3</sup> Department of Cardiology, Tokyo Saiseikai Central Hospital, Tokyo 108-0073, Japan; makoto\_tk@hotmail.com

<sup>4</sup> Department of Medicine, Division of Cardiovascular Medicine, Stanford University, Stanford, CA 94305, USA; mkawana@stanford.edu

\* Correspondence: yasshiraishi@keio.jp; Tel.: +81-3-3353-1211; Fax: +81-3-5843-6167

---

## Table of Contents

**Figure S1.** A summary of the Kansas City Cardiomyopathy Questionnaire scores

**Table S1.** Patient backgrounds in patients undergoing right heart catheterization

**Table S2.** Subgroup analysis on correlation of accelerometer-measured physical activity with the Kansas City Cardiomyopathy Questionnaire for patients receiving right heart catheterization

**Table S3.** Subgroup analysis on correlation of physical activity assessed by cardiopulmonary exercise testing with the Kansas City Cardiomyopathy Questionnaire and accelerometer-measured parameters for patients receiving right heart catheterization

**Figure S1.** A summary of the Kansas City Cardiomyopathy Questionnaire scores.

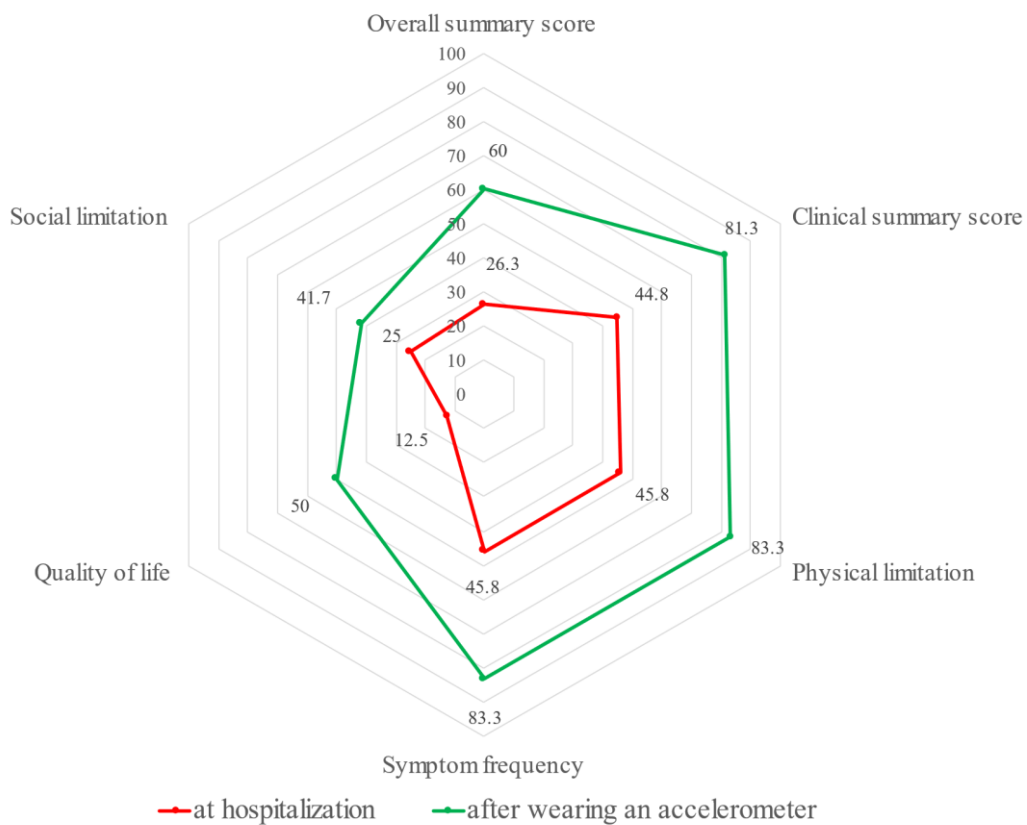

**Table S1.** Patient backgrounds in patients undergoing right heart catheterization.

| Value                                                         | Patients with RHC<br>n = 14 |
|---------------------------------------------------------------|-----------------------------|
| Age, years                                                    | 69 (55–79)                  |
| Men, n (%)                                                    | 9 (64)                      |
| Body mass index, kg/m <sup>2</sup>                            | 21.0 (20.4–25.5)            |
| Systolic blood pressure, mm Hg                                | 98 (91–107)                 |
| Heart rate, bpm                                               | 70 (59–74)                  |
| LVEF, %                                                       | 27 (25–34)                  |
| LVDd, mm                                                      | 58 (56–69)                  |
| LVDs, mm                                                      | 51 (44–60)                  |
| NYHA class, n (%)                                             |                             |
| II                                                            | 10 (71)                     |
| III                                                           | 4 (29)                      |
| Clinical frailty scale, n (%)                                 |                             |
| 2 (fit)                                                       | 6 (43)                      |
| 3 (managing well)                                             | 5 (36)                      |
| 4 (very mild frailty)                                         | 3 (21)                      |
| 5 (mild frailty)                                              | 0 (0)                       |
| Triggers of acute decompensation                              |                             |
| Nonadherence to diet, n (%)                                   | 0 (0)                       |
| Nonadherence to medication, n (%)                             | 1 (7)                       |
| Overwork, n (%)                                               | 2 (14)                      |
| Arrhythmia, n (%)                                             | 1 (7)                       |
| Ischemia, n (%)                                               | 1 (7)                       |
| Infection, n (%)                                              | 2 (14)                      |
| Others or none, n (%)                                         | 7 (50)                      |
| Past medical history                                          |                             |
| Patients with ≥1 HF hospitalization in previous 1 year, n (%) | 5 (36)                      |
| Coronary artery disease, n (%)                                | 3 (21)                      |
| Atrial fibrillation, n (%)                                    | 3 (21)                      |
| Hypertension, n (%)                                           | 6 (43)                      |
| Diabetes mellitus, n (%)                                      | 1 (7)                       |
| Stroke, n (%)                                                 | 5 (36)                      |
| COPD, n (%)                                                   | 2 (14)                      |
| Laboratory test                                               |                             |
| Hemoglobin, g/dL                                              | 12.0 (11.1–13.8)            |
| Creatinine, mg/L                                              | 1.0 (0.9–1.4)               |
| Blood urea nitrogen, mg/L                                     | 23.5 (16.3–32.8)            |
| Sodium, mEq/L                                                 | 139.1 (137.7–140.3)         |
| Potassium, mEq/L                                              | 4.4 (4.1–4.5)               |
| Total bilirubin, mg/L                                         | 0.9 (0.7–1.2)               |
| Albumin, mg/L                                                 | 4.0 (3.5–4.0)               |
| BNP at hospitalization, pg/mL                                 | 916 (256–1896)              |
| BNP at discharge, pg/mL                                       | 342 (178–432)               |
| BNP improvement during hospitalization, % *                   | 58.4 (47.2–85.2)            |
| HF treatment                                                  |                             |
| Loop diuretics, n (%)                                         | 11 (79)                     |
| ACEi or ARB, n (%)                                            | 13 (93)                     |

|                                         |                  |
|-----------------------------------------|------------------|
| <b>ARNi, n (%)</b>                      | 0 (0)            |
| <b>Beta blocker, n (%)</b>              | 13 (93)          |
| <b>MRA, n (%)</b>                       | 9 (64)           |
| <b>SGLT2i, n (%)</b>                    | 3 (21)           |
| <b>ICD, n (%)</b>                       | 2 (14)           |
| <b>CRT, n (%)</b>                       | 1 (7)            |
| <b>CPX parameter <sup>#</sup></b>       |                  |
| <b>Peak VO<sub>2</sub>, ml/kg/min</b>   | 11.3 (9.7–15.7)  |
| <b>AT VO<sub>2</sub>, ml/kg/min</b>     | 9.3 (8.6–11.5)   |
| <b>VE vs. VCO<sub>2</sub> slope</b>     | 37.1 (30.6–47.9) |
| <b>Accelerometer-measured parameter</b> |                  |
| <b>Daily step counts, n/day</b>         | 2539 (1263–4252) |
| <b>Exercise time</b>                    | 2.2 (1.1–3.5)    |
| <b>%sedentary time, %</b>               | 71.9 (63.7–82.0) |

\* BNP improvement was defined as (BNP at admission – BNP at discharge) / BNP at admission.

Abbreviations: LVEF, left ventricular ejection fraction; LVDd, left ventricular end-diastolic diameter; LVDs, left ventricular end-systolic diameter; NYHA, New York Heart Association; HF, heart failure; COPD, chronic obstructive pulmonary disease; BNP, B-type natriuretic peptide; ACEi, angiotensin-converting enzyme inhibitor; ARB, angiotensin receptor antagonist; ARNI, angiotensin receptor neprilysin inhibitor; MRA, mineralocorticoid receptor antagonist; SGLT2i, sodium glucose cotransporter-2 inhibitor; ICD, implantable cardioverter defibrillator; CRT, cardiac resynchronization therapy; CPX, cardiopulmonary exercise testing; VO<sub>2</sub>, oxygen consumption; AT, anaerobic threshold; VE, expiratory minute volume; VCO<sub>2</sub>, carbon dioxide production;.

**Table S2.** Subgroup analysis on correlation of accelerometer-measured physical activity with the Kansas City Cardiomyopathy Questionnaire for patients receiving right heart catheterization.

| Value                  | Accelerometer-measured parameters |                       |                        |
|------------------------|-----------------------------------|-----------------------|------------------------|
|                        | Daily step count                  | Exercise time         | %sedentary time        |
| KCCQ-OSS               | $r = 0.43, P = 0.125$             | $r = 0.56, P = 0.037$ | $r = -0.63, P = 0.017$ |
| KCCQ-CSS               | $r = 0.58, P = 0.029$             | $r = 0.61, P = 0.022$ | $r = -0.77, P = 0.001$ |
| Each domain of KCCQ-12 |                                   |                       |                        |
| Physical limitation    | $r = 0.56, P = 0.037$             | $r = 0.52, P = 0.056$ | $r = -0.66, P = 0.011$ |
| Symptom frequency      | $r = 0.52, P = 0.057$             | $r = 0.60, P = 0.024$ | $r = -0.77, P = 0.001$ |
| Quality of life        | $r = -0.03, P = 0.931$            | $r = 0.28, P = 0.337$ | $r = -0.44, P = 0.118$ |
| Social limitation      | $r = 0.21, P = 0.482$             | $r = 0.32, P = 0.258$ | $r = -0.13, P = 0.658$ |

$r$  represents Pearson's correlation coefficient. %sedentary time is defined as sedentary time / device-equipped time.

Abbreviations: KCCQ, Kansas City Cardiomyopathy Questionnaire; OSS, overall summary score; CSS, clinical summary score.

**Table S3.** Subgroup analysis on correlation of physical activity assessed by cardiopulmonary exercise testing with the Kansas City Cardiomyopathy Questionnaire and accelerometer-measured parameters for patients receiving right heart catheterization.

| Value                             | Cardiopulmonary exercise testing parameters |                      |                               |
|-----------------------------------|---------------------------------------------|----------------------|-------------------------------|
|                                   | Peak VO <sub>2</sub>                        | AT VO <sub>2</sub>   | VE vs. VCO <sub>2</sub> slope |
| KCCQ-OSS                          | r = 0.51, P = 0.094                         | r = 0.38, P = 0.227  | r = -0.21, P = 0.519          |
| KCCQ-CSS                          | r = 0.54, P = 0.072                         | r = 0.48, P = 0.117  | r = -0.29, P = 0.369          |
| Each domain of KCCQ-12            |                                             |                      |                               |
| Physical limitation               | r = 0.59, P = 0.046                         | r = 0.56, P = 0.057  | r = -0.31, P = 0.328          |
| Symptom frequency                 | r = 0.44, P = 0.158                         | r = 0.34, P = 0.275  | r = -0.23, P = 0.466          |
| Quality of life                   | r = 0.56, P = 0.061                         | r = 0.35, P = 0.260  | r = -0.03, P = 0.920          |
| Social limitation                 | r = 0.12, P = 0.704                         | r = 0.01, P = 0.996  | r = -0.06, P = 0.843          |
| Accelerometer-measured parameters |                                             |                      |                               |
| Daily step count                  | r = 0.15, P = 0.651                         | r = 0.25, P = 0.425  | r = -0.27, P = 0.394          |
| Exercise time                     | r = 0.13, P = 0.682                         | r = -0.16, P = 0.616 | r = -0.23, P = 0.476          |
| %sedentary time                   | r = -0.74, P = 0.006                        | r = -0.63, P = 0.028 | r = 0.39, P = 0.211           |

r represents Pearson's correlation coefficient. %sedentary time is defined as sedentary time / device-equipped time.

Abbreviations: KCCQ, Kansas City Cardiomyopathy Questionnaire; OSS, overall summary score; CSS, clinical summary score; VO<sub>2</sub>, oxygen consumption; AT, anaerobic threshold; VE, expiratory minute volume; VCO<sub>2</sub>, carbon dioxide production.
